# Supplementary material for: Using the community-based breeding program (CBBP) model as a collaborative platform to develop the African Goat Improvement Network—Image collection protocol (AGIN-ICP) with mobile technology for data collection and management of livestock phenotypes
Source: PubMed Central journal article supplement (PMC10512022; doi:10.3389/fgene.2023.1200770), 2023-09-06
Supplement: Presentation2.pdf [file Presentation2.pdf]

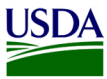

# ADAPTMap SAMPLE SERIES note position of signs, handler, tarps, weights

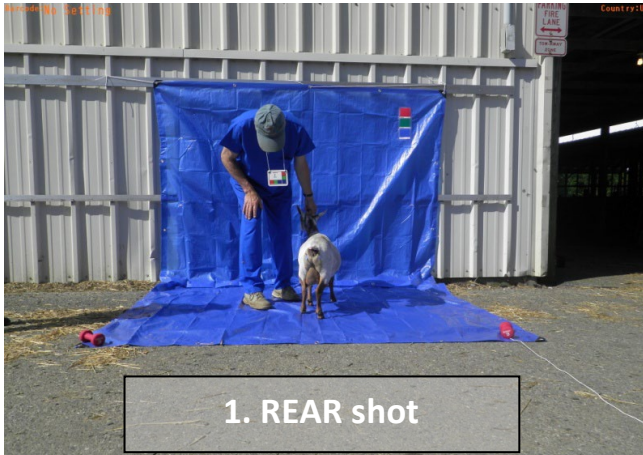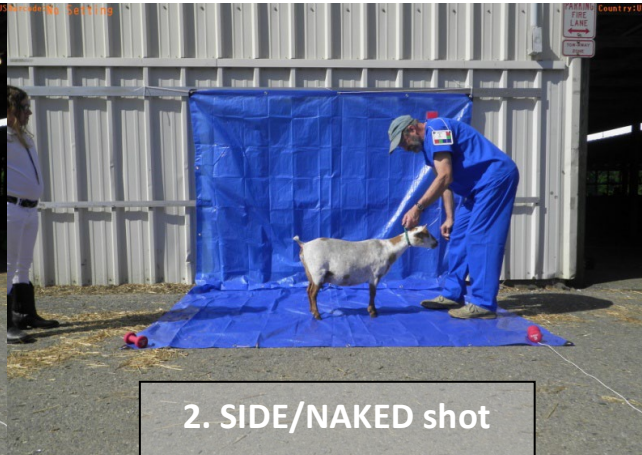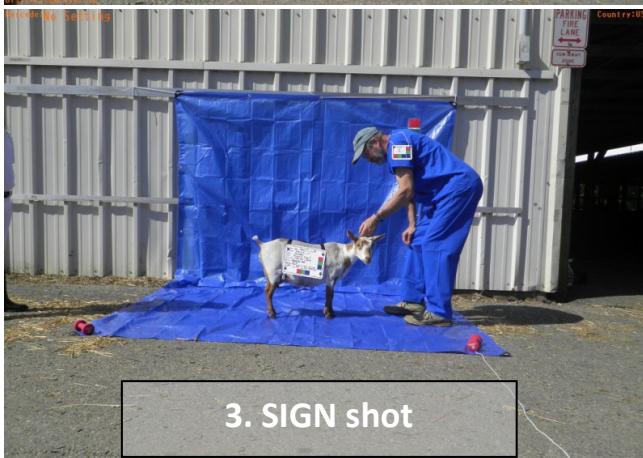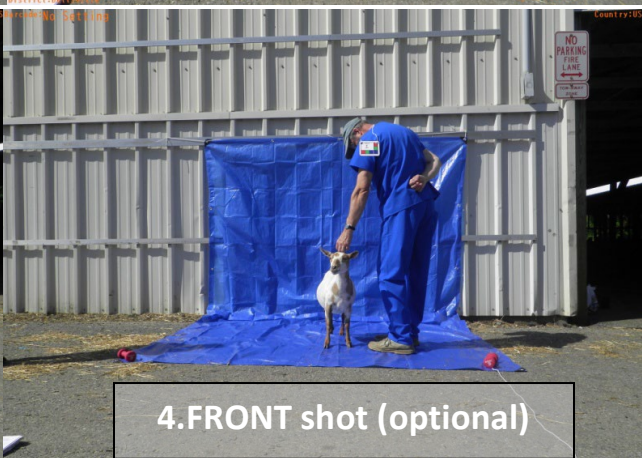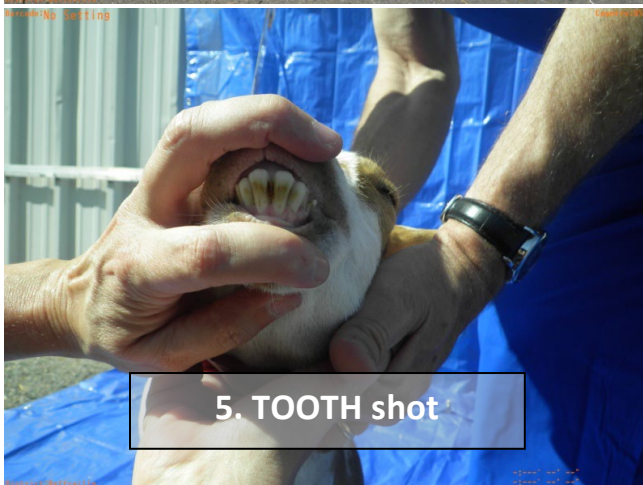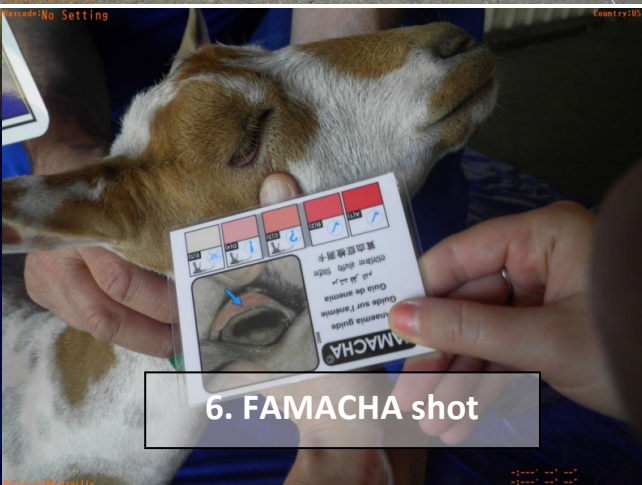

Set-up in flat, open space. Tarps connect at bottom; eliminate folds and ripples. Handler must wear blue top and bottoms. Shoot the photo series in the above sequence, camera perpendicular to goat, and at goat-eye-level. Use calibration rope to ensure camera is 3 M back from goat. Handler or other objects must not be between goat, including goat's feet/legs, and the back tarp. The small sign is visible in all distance shots. Avoid placing unnecessary objects on the tarps, and pull any lead ropes away from the goat's body.

# Digital Image Analysis Workflow

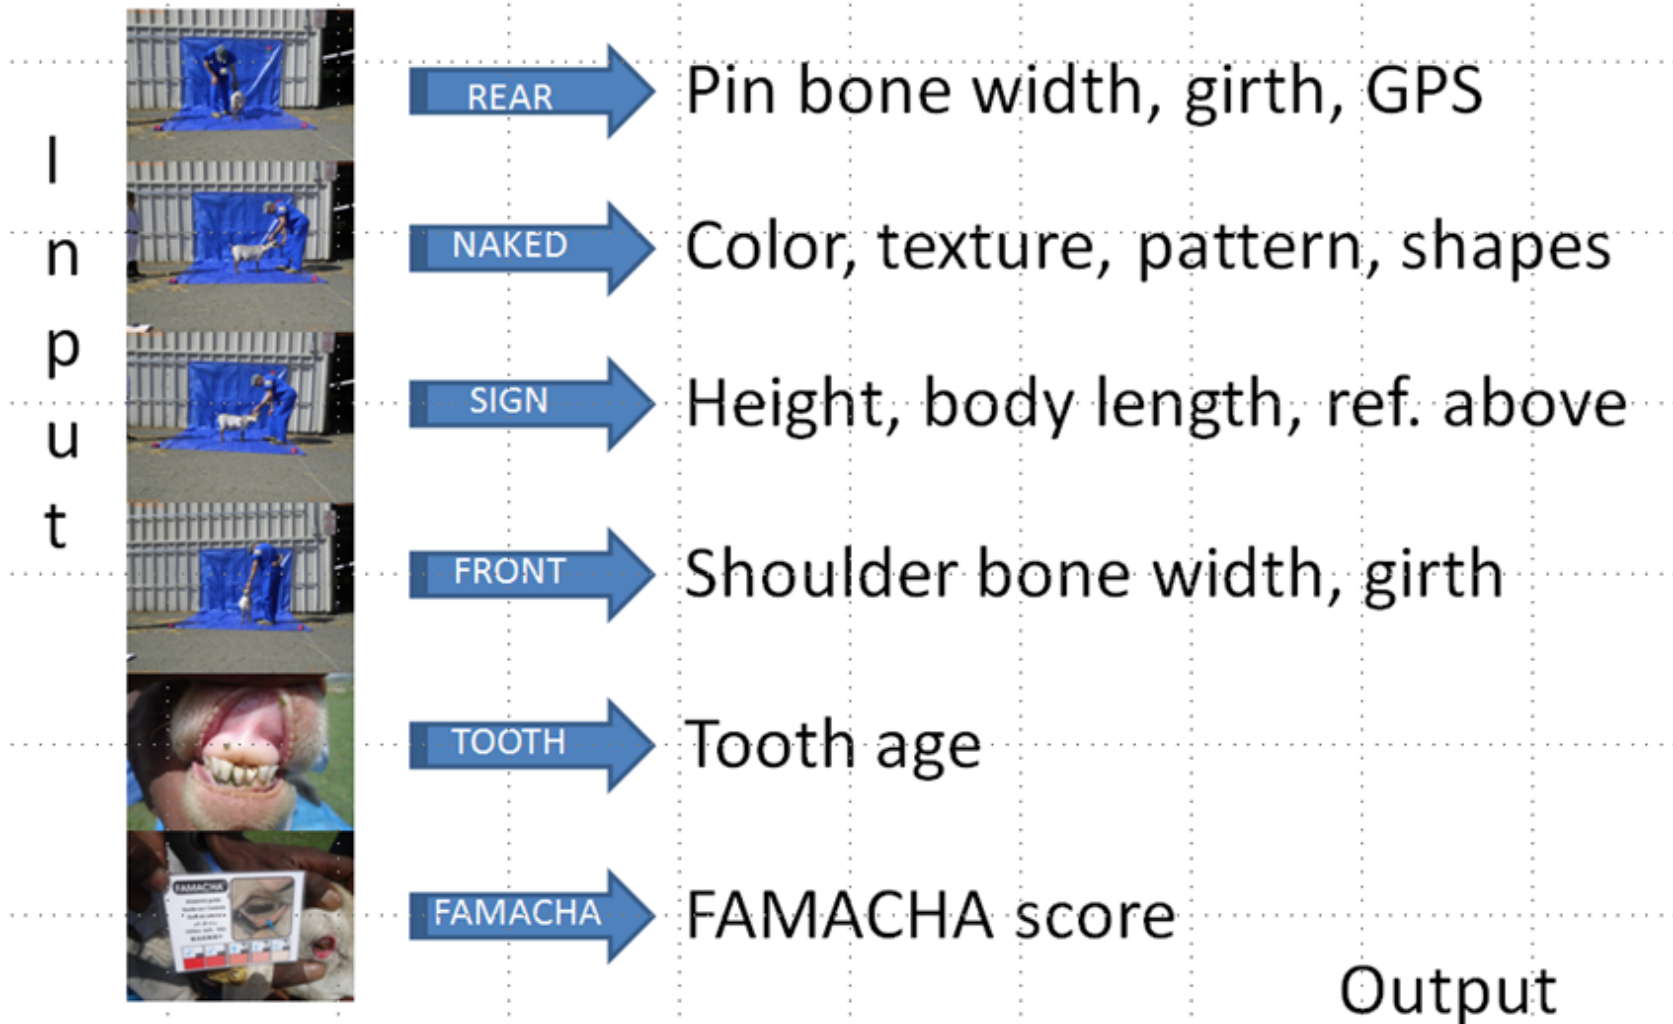

Set-up in flat, open space. Tarps connect at bottom; eliminate folds and ripples. Handler must wear blue top and bottoms. Shoot the photo series in the above sequence, camera perpendicular to goat, and at goat-eye-level. Use calibration rope to ensure camera is 3 M back from goat. Handler or other objects must not be between goat, including goat's feet/legs, and the back tarp. The small sign is visible in all distance shots. Avoid placing unnecessary objects on the tarps, and pull any lead ropes away from the goat's body.
